# Supplementary material for: Risk factors and implications associated with renal mineralization in chronic kidney disease in cats
Source: PubMed Central journal article supplement (PMC8965253; doi:10.1111/jvim.16363), 2022-01-19
Supplement: JVIM-36-634-s001.pdf [file JVIM-36-634-s001.pdf]

**SUPPLEMENTARY TABLE 3.** Linear mixed model analyses examining the change in clinicopathological variables over the first 365 days after a diagnosis of azotemic CKD in cats (n = 51). Summary of intercepts and the slopes of time among groups (“Not eating PRD” vs. “Eating 10–50% PRD“ vs. “Eating ≥50% PRD”).

| Variables                                | Not eating PRD (n = 15) |                             |                 | Eating 10–50% PRD (n = 12) |                             |                 | Eating ≥50% PRD (n = 24) |                             |                 |
|------------------------------------------|-------------------------|-----------------------------|-----------------|----------------------------|-----------------------------|-----------------|--------------------------|-----------------------------|-----------------|
|                                          | Intercept               | Coefficient of time (month) | <i>P</i> -value | Intercept                  | Coefficient of time (month) | <i>P</i> -value | Intercept                | Coefficient of time (month) | <i>P</i> -value |
| Body weight (kg)                         | 4.4 ± 0.2               | (-0.10) ± 0.02              | <b>&lt;.01</b>  | 3.9 ± 0.3                  | (-0.03) ± 0.02              | .12             | 3.7 ± 0.2                | (-0.02) ± 0.01              | .12             |
| Albumin (g/dL)                           | 3.07 ± 0.07             | (-0.017) ± 0.010            | .11             | 3.03 ± 0.08                | 0.005 ± 0.010               | .62             | 3.14 ± 0.05              | 0.003 ± 0.006               | .60             |
| ALP (U/L)                                | 64 ± 26                 | (-1.0) ± 3.1                | .76             | 90 ± 31                    | 3.9 ± 3.1                   | .21             | 69 ± 20                  | 2.5 ± 2.0                   | .23             |
| ALT (U/L)                                | 136 ± 46                | (-0.7) ± 6.6                | .93             | 140 ± 53                   | 9.6 ± 6.5                   | .15             | 86 ± 35                  | 1.4 ± 4.2                   | .74             |
| CaPP (mg <sup>2</sup> /dL <sup>2</sup> ) | 50.6 ± 4.5              | 2.27 ± 1.10                 | <b>.05</b>      | 40.2 ± 5.2                 | 1.55 ± 1.09                 | .16             | 49.5 ± 3.4               | 0.35 ± 0.71                 | .62             |
| Chloride (mEq/L)                         | 117 ± 1                 | (-0.3) ± 0.2                | .20             | 118 ± 1                    | 0.1 ± 0.2                   | .66             | 117 ± 1                  | 0.1 ± 0.1                   | .66             |
| Creatinine (mg/dL)                       | 2.77 ± 0.15             | 0.156 ± 0.067               | <b>.02</b>      | 2.56 ± 0.17                | 0.026 ± 0.067               | .70             | 2.68 ± 0.11              | 0.060 ± 0.044               | .18             |
| PCV (%)                                  | 34 ± 1                  | (-0.7) ± 0.2                | <b>&lt;.01</b>  | 33 ± 2                     | (-0.2) ± 0.2                | .33             | 33 ± 1                   | (-0.4) ± 0.1                | <b>.01</b>      |
| Phosphate (mg/dL)                        | 4.99 ± 0.46             | 0.246 ± 0.096               | <b>.02</b>      | 4.05 ± 0.52                | 0.122 ± 0.094               | .21             | 4.76 ± 0.34              | 0.029 ± 0.061               | .63             |
| Potassium (mEq/L)                        | 4.19 ± 0.12             | (-0.031) ± 0.021            | .15             | 3.92 ± 0.14                | (-0.004) ± 0.023            | .86             | 4.10 ± 0.09              | 0.017 ± 0.014               | .24             |
| Sodium (mEq/L)                           | 151.5 ± 0.7             | 0.002 ± 0.177               | .99             | 151.2 ± 0.8                | 0.115 ± 0.191               | .55             | 151.3 ± 0.5              | (-0.010) ± 0.117            | .93             |
| Total calcium (mg/dL)                    | 10.11 ± 0.18            | (-0.016) ± 0.033            | .63             | 10.14 ± 0.21               | 0.022 ± 0.034               | .53             | 10.39 ± 0.14             | (-0.002) ± 0.021            | .92             |
| Total protein (g/dL)                     | 7.9 ± 0.1               | (-0.03) ± 0.02              | .21             | 7.6 ± 0.2                  | (-0.02) ± 0.02              | .50             | 7.7 ± 0.1                | (-0.01) ± 0.01              | .32             |
| Urea (mg/dL)                             | 48.5 ± 3.7              | 3.47 ± 1.60                 | <b>.04</b>      | 48.1 ± 4.2                 | 0.94 ± 1.68                 | .58             | 50.7 ± 2.8               | 2.25 ± 1.06                 | <b>.04</b>      |

Outcome variables showing significant rate of change in each group ( $P < .05$ ) are highlighted in bold. The unit used for time was month (30.4 days). Results are presented as coefficient ± standard error.

Abbreviation: ALP, alkaline phosphatase; ALT, alanine aminotransferase; CaPP, calcium phosphate product.
