# Supplementary material for: Risk factors and implications associated with renal mineralization in chronic kidney disease in cats
Source: PubMed Central journal article supplement (PMC8965253; doi:10.1111/jvim.16363), 2022-01-19
Supplement: JVIM-36-634-s002.pdf [file JVIM-36-634-s002.pdf]

**SUPPLEMENTARY TABLE 2.** Linear mixed model analyses examining the rate of change in CKD-MBD variables over the first 365 days after a diagnosis of azotaemic CKD in cats (n = 51). Summary of *P*-values for all variables included in the model. Group represents cats in “Not eating PRD”, “Eating 10–50% PRD” or “Eating ≥50% PRD” based on the proportion of PRD ingested during the course of CKD.

| Variables                                | Group | Time           | Group*Time |
|------------------------------------------|-------|----------------|------------|
| Body weight (kg)                         | .08   | <b>&lt;.01</b> | <b>.02</b> |
| Albumin (g/dL)                           | .48   | .60            | .22        |
| ALP (U/L)                                | .79   | .27            | .52        |
| ALT (U/L)                                | .59   | .32            | .49        |
| CaPP (mg <sup>2</sup> /dL <sup>2</sup> ) | .26   | <b>.02</b>     | .31        |
| Chloride (mEq/L)                         | .68   | .48            | .47        |
| Creatinine (mg/dL)                       | .66   | <b>.03</b>     | .36        |
| PCV (%)                                  | .87   | <b>&lt;.01</b> | .36        |
| Phosphate (mg/dL)                        | .37   | <b>.01</b>     | .17        |
| Potassium (mEq/L)                        | .34   | .59            | .18        |
| Sodium (mEq/L)                           | .97   | .71            | .85        |
| Total calcium (mg/dL)                    | .38   | .95            | .72        |
| Total protein (g/dL)                     | .54   | .10            | .85        |
| Urea (mg/dL)                             | .84   | <b>.01</b>     | .56        |

Outcome variables showing significant change over time and among groups ( $P < .05$ ) are highlighted in bold. The unit used for time was month (30.4 days). A significant difference in the group column indicates a significant difference among the three groups at baseline for a given parameter (the start of the regression line at time 0). A significant difference in Group\*Time indicates that the outcome variable differs significantly among groups (“Not eating PRD” vs. “Eating 10–50% PRD” vs. “Eating ≥50% PRD”) over time. If Group\*Time was not significant, a significant difference in Time indicates the overall rate of change of the outcome variable differs significantly from baseline over time.

Abbreviation: ALP, alkaline phosphatase; ALT, alanine aminotransferase; CaPP, calcium phosphate product.
