# Supplementary material for: Risk factors and implications associated with renal mineralization in chronic kidney disease in cats
Source: PubMed Central journal article supplement (PMC8965253; doi:10.1111/jvim.16363), 2022-01-19
Supplement: JVIM-36-634-s003.pdf [file JVIM-36-634-s003.pdf]

**SUPPLEMENTARY TABLE 1.** Linear mixed model analyses examining the change in clinicopathological variables over the first 365 days after a diagnosis of azotemic CKD in cats (n = 51). Summary of intercepts and the slopes of time among groups according to the severity of nephrocalcinosis (“Grade 0” vs. “Grade 1” vs. “Grade 2”).

| Variables                                | Grade 0 (n = 11) |                             |                | Grade 1 (n = 14) |                             |                | Grade 2 (n = 26) |                             |            |
|------------------------------------------|------------------|-----------------------------|----------------|------------------|-----------------------------|----------------|------------------|-----------------------------|------------|
|                                          | Intercept        | Coefficient of time (month) | P-value        | Intercept        | Coefficient of time (month) | P-value        | Intercept        | Coefficient of time (month) | P-value    |
| Body weight (kg)                         | 4.3 ± 0.3        | (-0.07) ± 0.03              | <b>.01</b>     | 3.7 ± 0.2        | (-0.02) ± 0.02              | .24            | 3.9 ± 0.2        | (-0.04) ± 0.02              | <b>.01</b> |
| Albumin (g/dL)                           | 2.98 ± 0.08      | (-0.018) ± 0.013            | .17            | 3.10 ± 0.07      | (-0.004) ± 0.009            | .62            | 3.13 ± 0.05      | (-0.004) ± 0.007            | .16        |
| ALP (U/L)                                | 79 ± 31          | (-0.5) ± 3.8                | .89            | 86 ± 27          | 1.9 ± 2.7                   | .50            | 61 ± 20          | 3.0 ± 2.1                   | .16        |
| ALT (U/L)                                | 98 ± 54          | (-4.9) ± 7.9                | .54            | 155 ± 47         | (-0.2) ± 5.5                | .97            | 95 ± 35          | 7.1 ± 4.3                   | .11        |
| CaPP (mg <sup>2</sup> /dL <sup>2</sup> ) | 56.1 ± 5.1       | 2.70 ± 1.29                 | <b>.04</b>     | 44.7 ± 4.5       | 0.87 ± 0.89                 | .34            | 46.0 ± 3.3       | 0.69 ± 0.71                 | .34        |
| Chloride (mEq/L)                         | 116 ± 1          | 0.12 ± 0.26                 | .66            | 117 ± 1          | 0.01 ± 0.18                 | .96            | 118 ± 1          | (-0.22) ± 0.15              | .16        |
| Creatinine (mg/dL)                       | 2.87 ± 0.17      | 0.250 ± 0.074               | <b>&lt;.01</b> | 2.54 ± 0.15      | 0.017 ± 0.056               | .77            | 2.67 ± 0.11      | 0.050 ± 0.042               | .24        |
| PCV (%)                                  | 32 ± 2           | (-0.5) ± 0.3                | .08            | 35 ± 1           | (-0.6) ± 0.2                | <b>&lt;.01</b> | 33 ± 1           | (-0.3) ± 0.2                | <b>.04</b> |
| Phosphate (mg/dL)                        | 5.65 ± 0.50      | 0.233 ± 0.115               | <b>.05</b>     | 4.37 ± 0.44      | 0.089 ± 0.079               | .27            | 4.43 ± 0.33      | 0.068 ± 0.064               | .29        |
| Potassium (mEq/L)                        | 4.00 ± 0.14      | (-0.017) ± 0.025            | .50            | 4.08 ± 0.12      | 0.016 ± 0.017               | .37            | 4.14 ± 0.09      | (-0.005) ± 0.015            | .75        |
| Sodium (mEq/L)                           | 150 ± 1          | 0.38 ± 0.22                 | .10            | 151 ± 1          | 0.02 ± 0.15                 | .88            | 152 ± 1          | (-0.13) ± 0.13              | .32        |
| Total calcium (mg/dL)                    | 10.00 ± 0.21     | 0.005 ± 0.040               | .89            | 10.26 ± 0.18     | (-0.007) ± 0.027            | .79            | 10.37 ± 0.13     | 0.003 ± 0.023               | .89        |
| Total protein (g/dL)                     | 7.7 ± 0.2        | (-0.04) ± 0.03              | .18            | 7.8 ± 0.2        | (-0.01) ± 0.02              | .50            | 7.7 ± 0.1        | (-0.02) ± 0.01              | .27        |
| Urea (mg/dL)                             | 51.4 ± 4.2       | 5.06 ± 1.82                 | <b>.01</b>     | 46.1 ± 3.7       | 1.00 ± 1.34                 | .46            | 50.5 ± 2.8       | 2.04 ± 1.07                 | .06        |

Outcome variables showing significant rate of change in each group ( $P < .05$ ) are highlighted in bold. The unit used for time was month (30.4 days). Results are presented as coefficient ± standard error. Abbreviation: ALP, alkaline phosphatase; ALT, alanine aminotransferase; CaPP, calcium phosphate product.
